# Supplementary material for: IGF2 loss of imprinting enhances colorectal cancer stem cells pluripotency by promoting tumor autophagy
Source: publisher site journal article supplement (doi:10.18632/aging.103837), 2020-11-05
Supplement: Supplementary file [file aging-v12i21-103837-supplementary-material-SD1.pdf]

SUPPLEMENTARY FIGURES

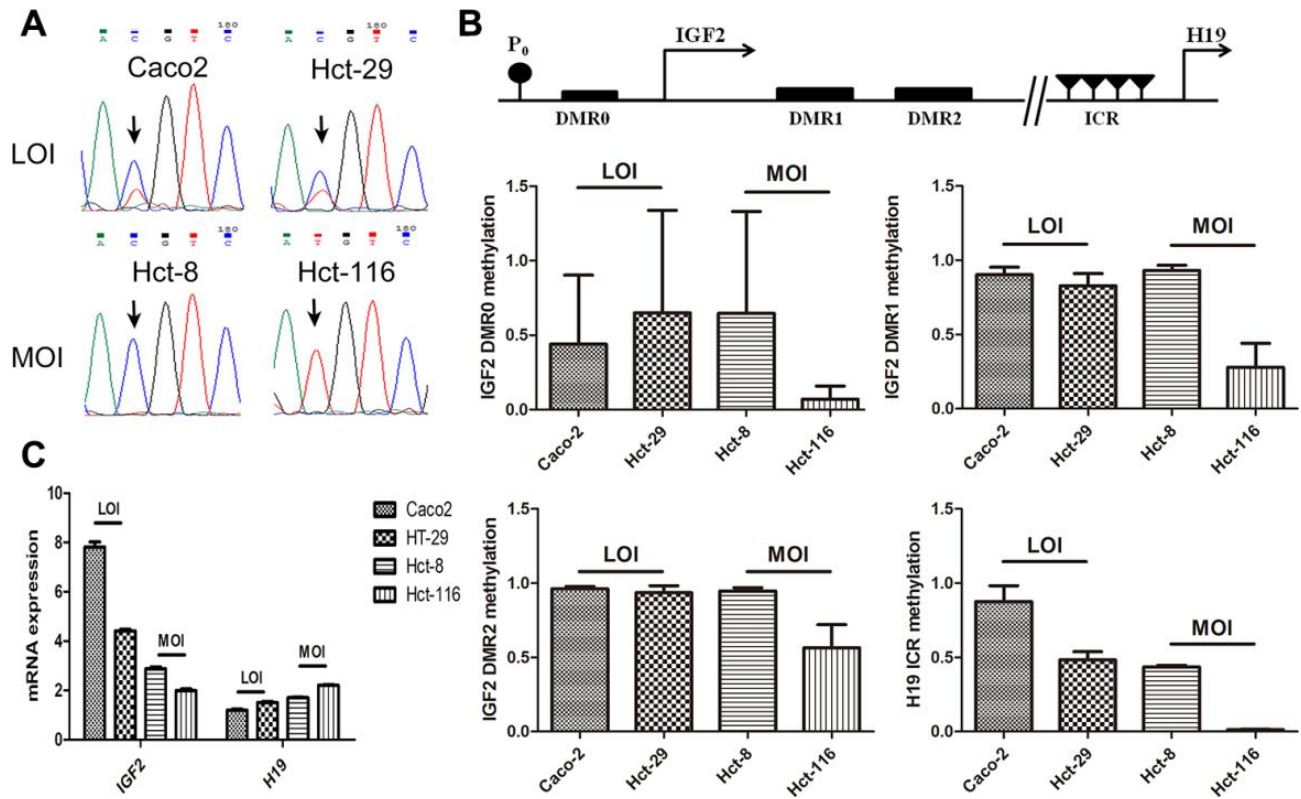

**Supplementary Figure 1. The detection of IGF2 imprint status and expression in CRC cells.** (A) the sequencing results of IGF2 rs680 single nucleotide polymorphism; (B) the results of methylation analysis in IGF2 DMR; (C) the expression levels of IGF2 and H19 in CRC cells.

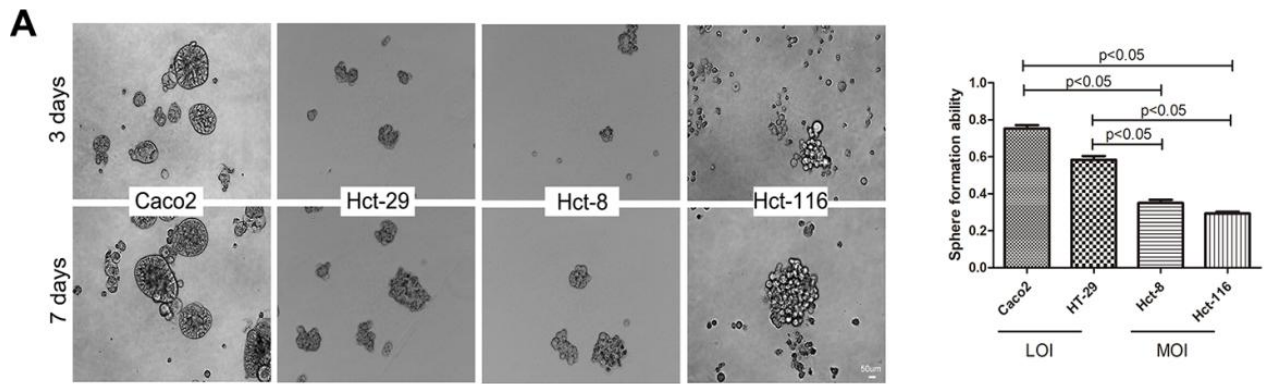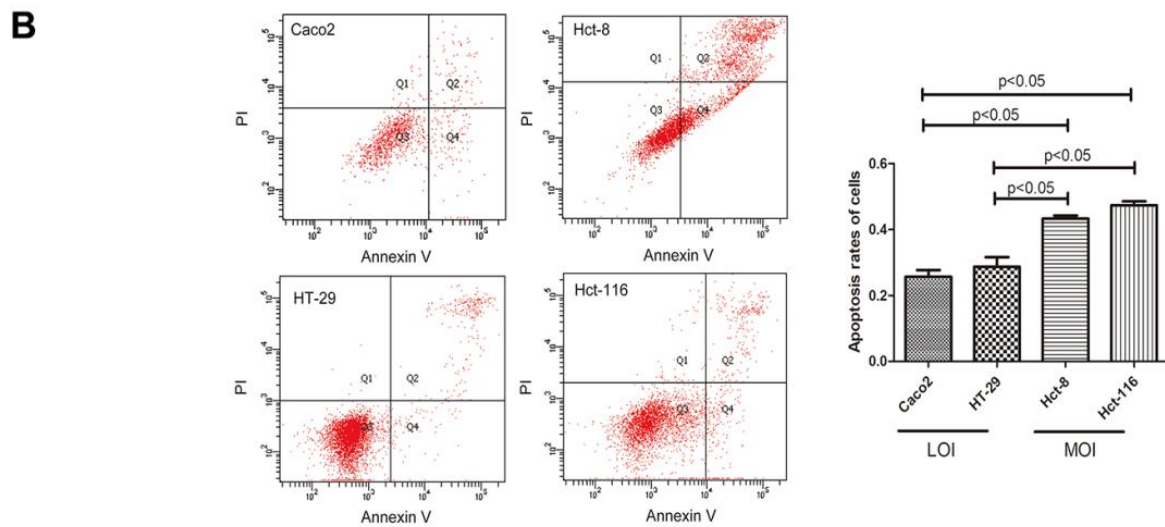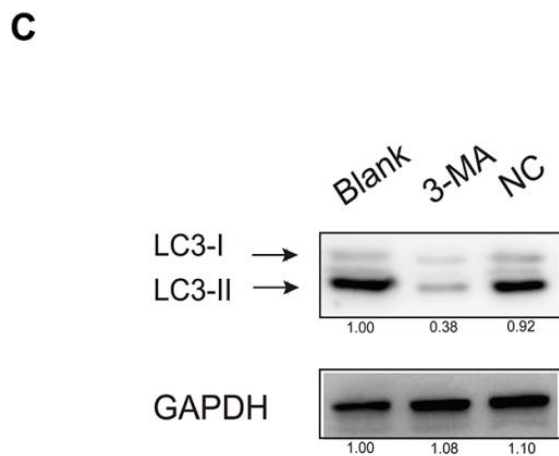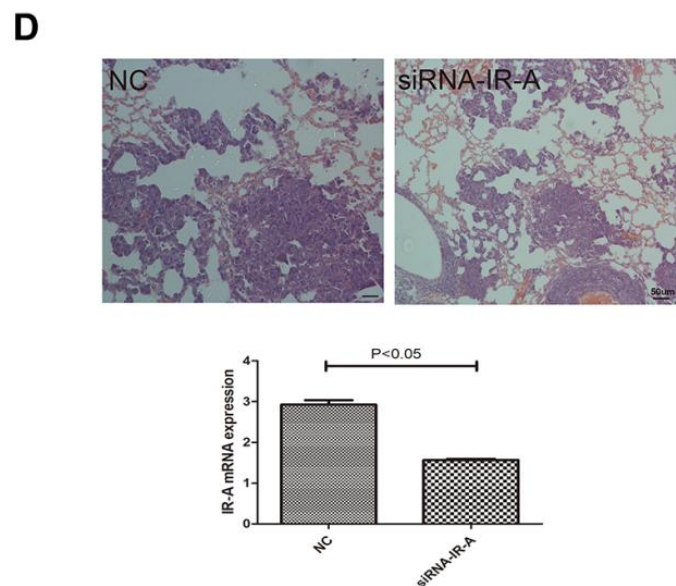

**Supplementary Figure 2. The biological differences of CRC cells with or without treatments. (A)** the sphere forming results of CRC cells with or without IGF2 LOI; **(B)** the comparison of apoptosis rates between IGF2 LOI and MOI CRC cells; **(C)** the LC3-II expression levels of IGF2 LOI CSCs with or without 3-MA treatment; **(D)** the HE and IR-A expression results of mice transfected with IR-A mRNA siRNA lentivirus.

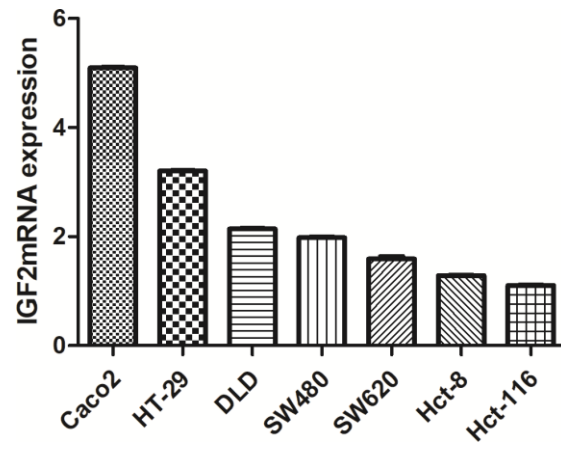

Supplementary Figure 3. The IGF2 expression on different CRC cell lines.
